# Supplementary material for: Does incidental pride increase competency evaluation of others who appear careless? Discrete positive emotions and impression formation
Source: PLoS One. 2019 Aug 8;14(8):e0220883. doi: 10.1371/journal.pone.0220883 (PMC6687287; doi:10.1371/journal.pone.0220883)
Supplement: S5 File — (XLSX) [file pone.0220883.s005.xlsx]

## Sheet: SupportingData(study2)
ID	age	sex	Emotion	SelfEsteem	Competence_A	Competence_B	Competence_C	Attractiveness_A	Attractiveness_B	Attractiveness_C	Warmth_A	Warmth_B	Warmth_C	Similarity_A	Similarity_B	Similarity_C	Pre_InternalCompetence	Post_InternalCompetence
201	30	2	awe	32	3	5	3	2	5	3	3	5	3	3	5	1	4	4
202	40	3	neutral	27	3	4	5	3	4	5	3	5	4	3	5	2	6	5
203	26	2	pride	24	3	3	4	5	4	4	4	4	5	4	4	3	3	5
204	34	2	awe	16	5	6	2	4	5	3	4	4	4	3	2	5	2	2
205	40	3	neutral	13	4	5	5	4	5	6	5	5	5	5	2	2	1	1
206	34	3	awe	27	4	4	3	4	4	5	5	4	5	5	4	5	4	4
207	43	2	neutral	20	5	5	4	5	5	3	5	5	4	3	4	3	3	3
208	45	2	pride	20	2	4	2	3	5	3	5	5	4	2	4	2	4	5
209	35	3	neutral	31	3	4	2	2	4	2	4	4	4	4	3	3	5	6
210	26	3	pride	32	6	6	4	5	4	5	4	4	5	5	4	5	6	6
211	20	2	neutral	24	5	3	3	4	4	5	4	4	5	3	5	3	4	4
212	46	2	neutral	25	5	3	5	5	4	4	4	5	5	5	4	4	3	3
213	41	2	awe	26	4	4	4	4	4	5	4	4	5	4	4	4	4	4
214	42	2	awe	28	5	4	5	4	3	4	4	6	2	3	4	4	4	4
215	29	2	pride	23	6	6	3	4	4	5	4	4	4	6	5	5	3	3
216	47	3	neutral	28	4	4	4	6	4	6	5	4	6	4	5	5	5	5
217	45	3	pride	27	4	4	4	4	4	3	4	4	4	5	5	5	3	4
218	25	3	pride	28	4	4	4	4	4	3	5	4	3	5	5	5	5	5
219	27	2	awe	21	1	1	1	2	4	1	1	2	2	1	1	1	5	5
220	27	3	neutral	24	4	5	4	5	4	5	5	4	4	5	4	3	4	4
221	36	3	awe	28	4	4	3	5	5	5	5	3	5	5	6	6	6	5
222	51	2	pride	27	3	4	2	3	3	3	4	4	4	5	4	5	6	5
223	32	2	neutral	22	4	5	3	6	6	6	5	4	5	3	4	3	3	3
224	49	3	neutral	29	6	6	5	5	4	4	4	4	4	4	3	3	5	5
225	57	2	neutral	27	4	4	4	5	4	5	5	4	5	3	4	3	4	4
226	24	3	pride	31	5	5	6	5	5	6	5	5	5	5	5	5	5	5
227	43	3	neutral	20	4	4	4	4	4	4	4	4	4	5	5	5	3	3
228	38	3	awe	19	6	6	6	5	5	5	4	4	4	4	2	5	2	3
229	32	2	awe	16	4	4	3	4	4	4	4	4	4	3	2	3	2	4
230	29	3	pride	28	4	5	4	4	4	4	4	4	4	4	4	4	4	5
231	46	3	neutral	24	4	4	4	4	4	4	4	4	4	5	7	7	3	5
232	41	2	awe	23	4	4	2	3	3	2	4	4	3	3	3	3	3	6
233	28	3	neutral	24	4	4	5	5	4	4	4	5	5	5	3	4	5	4
234	31	3	neutral	13	5	6	5	5	6	4	5	6	5	1	1	1	2	1
235	62	2	awe	20	4	4	4	4	4	1	4	4	4	5	4	2	4	4
236	38	2	awe	25	4	4	4	4	4	4	4	4	4	4	4	4	4	4
237	46	3	awe	29	3	5	3	5	4	5	6	4	5	4	3	5	5	5
238	42	3	awe	30	4	6	3	3	5	4	4	4	5	3	5	3	5	5
239	36	2	pride	26	4	5	5	4	4	5	5	4	4	4	5	5	3	3
240	42	2	pride	13	5	5	4	5	5	4	5	5	4	4	4	3	3	4
241	35	2	pride	24	4	4	3	4	4	3	4	4	4	3	4	4	4	4
242	28	2	pride	14	4	4	4	5	4	5	4	4	4	6	5	6	1	4
243	33	2	neutral	10	4	2	4	3	4	3	4	4	4	7	7	7	1	4
244	31	3	awe	32	4	3	5	5	3	5	6	6	6	5	5	5	6	6
245	34	2	neutral	35	3	4	1	3	4	1	4	5	4	4	3	1	6	5
246	47	2	awe	17	6	4	6	5	4	6	5	4	4	4	5	3	3	2
247	49	3	neutral	28	4	4	4	4	4	4	4	4	4	5	5	3	5	5
248	33	3	awe	32	4	3	6	4	3	6	4	3	4	4	1	3	5	5
249	41	3	neutral	23	7	7	4	4	4	4	4	4	4	7	1	7	1	1
250	51	3	awe	29	5	6	6	4	4	4	4	4	4	4	4	4	5	5
251	20	2	pride	19	3	5	1	7	5	7	5	3	6	4	3	7	2	3
252	47	2	awe	27	3	4	4	4	5	3	5	5	4	4	4	3	5	5
253	54	3	awe	29	5	5	5	5	5	5	5	5	5	5	5	5	5	4
254	44	2	neutral	19	3	5	3	3	5	3	4	3	4	1	2	1	3	4
255	43	2	pride	32	5	5	4	6	4	4	5	5	5	4	3	4	6	6
256	39	3	pride	20	5	4	4	5	5	6	6	6	5	1	2	2	2	2
257	35	2	neutral	21	3	4	3	4	5	5	4	4	5	3	2	4	3	4
258	50	3	awe	30	4	4	4	4	4	4	4	4	4	5	5	5	5	5
259	70	2	neutral	30	3	5	4	5	5	5	6	6	6	5	4	4	5	5
260	32	3	pride	19	2	5	4	2	5	4	4	5	4	3	4	5	4	4
261	32	2	awe	23	4	5	4	5	4	5	4	3	4	5	4	3	4	2
262	33	2	neutral	27	4	4	4	4	4	4	4	4	4	3	4	2	4	4
263	43	2	awe	21	3	4	2	4	5	3	5	3	7	5	5	5	4	3
264	38	3	pride	22	5	6	5	5	5	6	4	6	4	3	3	5	4	5
265	56	3	pride	28	3	5	5	4	3	4	3	3	4	4	4	2	5	5
266	36	3	pride	19	3	4	3	4	4	2	4	4	3	4	2	3	2	3
267	62	2	neutral	26	5	4	5	5	4	5	4	5	5	4	4	4	5	5
268	65	3	neutral	36	4	5	5	5	4	4	5	5	5	3	3	2	7	7
269	53	2	pride	33	5	6	6	4	5	4	4	4	4	5	4	5	6	6
270	59	2	neutral	26	4	4	4	4	4	5	4	4	4	5	5	5	4	4
271	53	2	neutral	30	6	5	7	5	5	6	4	4	4	4	4	5	6	5
272	35	3	awe	28	6	6	4	5	6	5	5	5	5	3	3	3	3	3
273	32	2	pride	28	2	4	4	4	4	4	4	3	4	5	3	3	5	5
274	58	2	neutral	28	4	4	4	4	4	4	5	4	4	3	3	3	4	4
275	43	2	awe	22	4	4	4	4	4	4	4	4	4	4	4	4	4	4
276	42	3	awe	32	5	5	5	5	5	5	4	4	5	6	3	6	4	6
277	48	2	pride	33	4	4	3	4	4	3	4	4	4	4	3	3	5	4
278	54	2	awe	22	3	3	4	4	4	4	4	4	4	3	3	3	4	4
279	20	2	awe	18	2	2	2	2	3	2	4	4	3	3	1	4	3	3
280	26	3	neutral	20	4	4	4	4	4	4	5	4	5	4	4	4	3	3
281	49	2	pride	17	5	5	5	6	5	5	4	5	5	2	3	3	3	3
282	35	3	neutral	20	5	5	5	5	5	3	4	4	4	3	3	4	3	3
283	42	2	pride	21	4	4	3	4	4	3	4	4	4	4	4	4	3	2
284	42	3	awe	30	4	4	3	5	5	3	5	4	4	5	5	4	5	5
285	44	2	pride	23	4	5	6	3	4	6	5	5	5	3	3	5	5	6
286	43	3	pride	23	4	4	4	5	4	5	6	4	5	5	4	5	4	4
287	45	3	neutral	32	4	5	3	3	4	5	4	4	5	3	4	3	5	5
288	30	2	awe	28	3	6	4	4	5	3	4	4	4	4	4	4	6	5
289	44	3	pride	20	4	4	4	5	4	5	4	4	4	5	5	5	2	3
290	37	2	neutral	29	5	5	3	4	5	4	5	5	4	5	4	4	4	4
291	42	2	neutral	20	4	4	4	4	4	4	4	4	4	4	4	4	3	3
292	38	2	awe	25	4	5	4	3	4	3	4	4	4	3	3	3	4	4
293	40	2	neutral	32	6	6	6	5	5	5	5	5	5	4	4	4	6	6
294	41	2	awe	13	4	5	3	3	4	6	4	4	5	4	3	5	1	2
295	43	3	neutral	29	4	4	4	5	5	5	4	5	4	5	4	4	5	5
296	35	3	pride	25	4	4	4	4	4	4	5	4	5	6	4	6	4	5
297	35	3	pride	25	3	4	3	4	4	4	4	4	4	5	5	5	5	7
298	46	3	awe	21	6	6	5	6	6	6	6	5	5	5	2	6	3	3
299	45	3	awe	25	3	5	3	3	6	4	4	5	4	2	3	2	4	4
300	47	3	awe	32	4	4	4	4	4	4	4	4	4	1	2	1	5	6
301	43	2	pride	27	4	4	4	4	4	3	4	4	4	4	4	4	4	4
302	41	2	neutral	20	5	5	5	5	5	5	4	4	4	3	3	3	3	3
303	40	3	neutral	23	4	5	3	4	4	4	5	5	5	5	4	3	5	6
304	54	3	awe	23	4	4	4	4	4	5	4	3	4	3	3	3	3	3
305	35	3	pride	28	4	4	4	4	4	4	5	4	4	5	5	5	5	5
306	37	2	awe	25	4	4	3	4	4	3	4	4	4	3	4	3	4	4
307	49	3	neutral	25	5	6	4	5	5	4	5	4	5	4	3	5	4	3
308	41	2	pride	23	4	4	4	4	4	3	4	4	4	5	3	3	5	6

## Sheet: Descriptions of variables
Variables	Which means	Coding
ID	Participants' ID number	Not Available
age	Age of the participant	Integer
sex	Gender of the participant	'2': Male Participants; '3': Female Participants
Emotion	Which condition the participant was randomly assigned to	nominal variables
SelfEsteem	A total score of the self-esteem questionnaire	continuous variables
Competence_A	Participants' ratings on the extent to which they thought the target who made a small blunder is competent	'1': Incompetent; '7': Competent; 7 point Likert-scales
Competence_B	Participants' ratings on the extent to which they thought the target who made a non-blunder is competent	'1': Incompetent; '7': Competent; 7 point Likert-scales
Competence_C	Participants' ratings on the extent to which they thought the target who made a big blunder is competent	'1': Incompetent; '7': Competent; 7 point Likert-scales
Attractiveness_A	Participants' ratings on the extent to which they thought the target who made a small blunder is attractive	'1': Unattractive; '7': Attractive; 7 point Likert-scales
Attractiveness_B	Participants' ratings on the extent to which they thought the target who made a non-blunder is attractive	'1': Unattractive; '7': Attractive; 7 point Likert-scales
Attractiveness_C	Participants' ratings on the extent to which they thought the target who made a big blunder is attractive	'1': Unattractive; '7': Attractive; 7 point Likert-scales
Warmth_A	Participants' ratings on the extent to which they thought the target who made a small blunder is warm	'1': Cold; '7': Warm; 7 point Likert-scales
Warmth_B	Participants' ratings on the extent to which they thought the target who made a non-blunder is warm	'1': Cold; '7': Warm; 7 point Likert-scales
Warmth_C	Participants' ratings on the extent to which they thought the target who made a big blunder is warm	'1': Cold; '7': Warm; 7 point Likert-scales
Similarity_A	Participants' ratings on the extent to which they thought the target who made a small blunder is similar with themselves	'1': Dissimilar; '7': Similar; 7 point Likert-scales
Similarity_B	Participants' ratings on the extent to which they thought the target who made a non-blunder is similar with themselves	'1': Dissimilar; '7': Similar; 7 point Likert-scales
Similarity_C	Participants' ratings on the extent to which they thought the target who made a big blunder is similar with themselves	'1': Dissimilar; '7': Similar; 7 point Likert-scales
Pre_InternalCompetence	Participants' ratings on competence about themselves priot to the emotion manipulation	'1': Incompetent; '7': Competent; 7 point Likert-scales
Post_InternalCompetence	Participants' ratings on competence about themselves after the emotion manipulation	'1': Incompetent; '7': Competent; 7 point Likert-scales
